# Supplementary material
Source: PubMed Central journal article supplement (PMC4260332)
Supplement: NIHMS637837-supplement-Supporting_Information.pdf [file NIHMS637837-supplement-Supporting_Information.pdf]

|                                                        |    |
|--------------------------------------------------------|----|
| LC-MS traces of ligands, complexes.....                | S2 |
| Titration of MnCl <sub>2</sub> to isolated ligand..... | S4 |
| Gd(III)-based contrast discussed in main text.....     | S4 |
| MRI SNR vs time curves for various organs.....         | S5 |

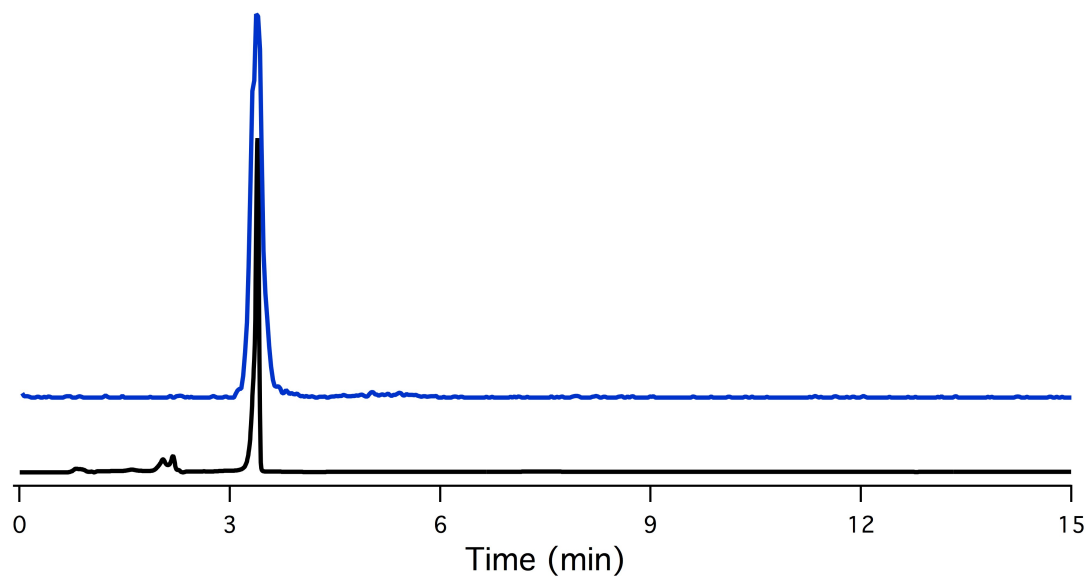

**Figure S1.** LC trace of monomer ligand at 280 nm detection (black) and MS chromatogram (blue) of extracted  $m/z^+ = 399.2$ .

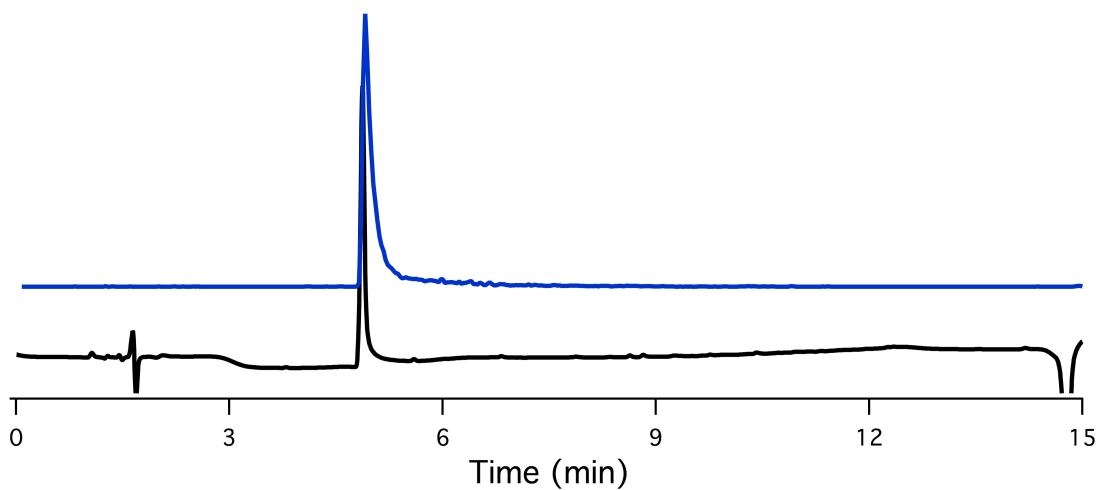

**Figure S2.** LC trace of hexamer ligand at 280 nm detection (black) and MS chromatogram (blue) of extracted  $m/3z^+ = 840.8$ .

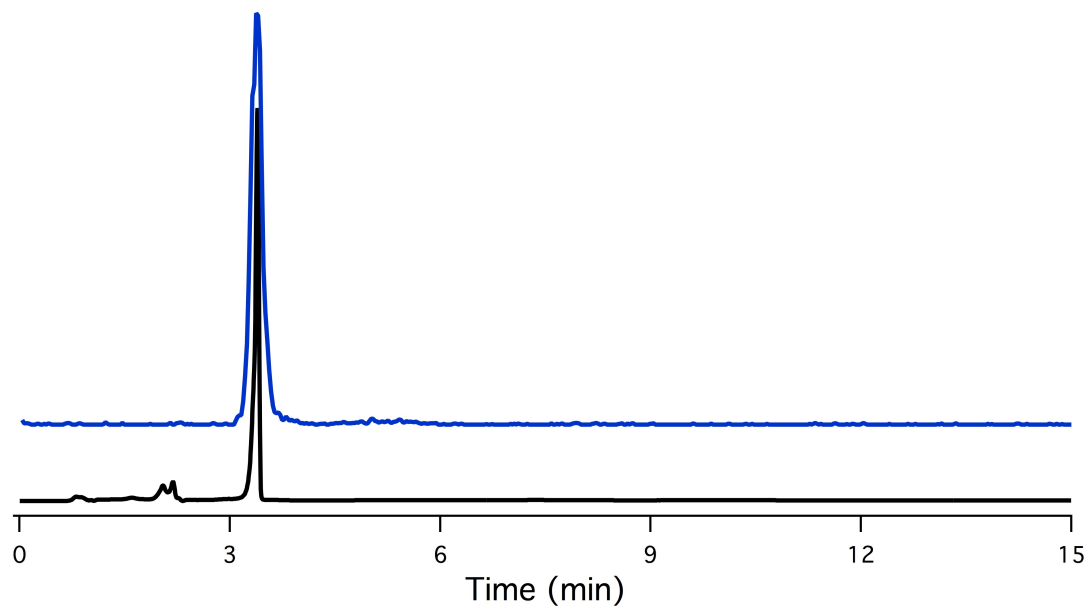

**Figure S3.** LC trace of monomeric complex at 280 nm detection (black) and MS chromatogram (blue) of extracted  $m/z^+ = 452.0$ .

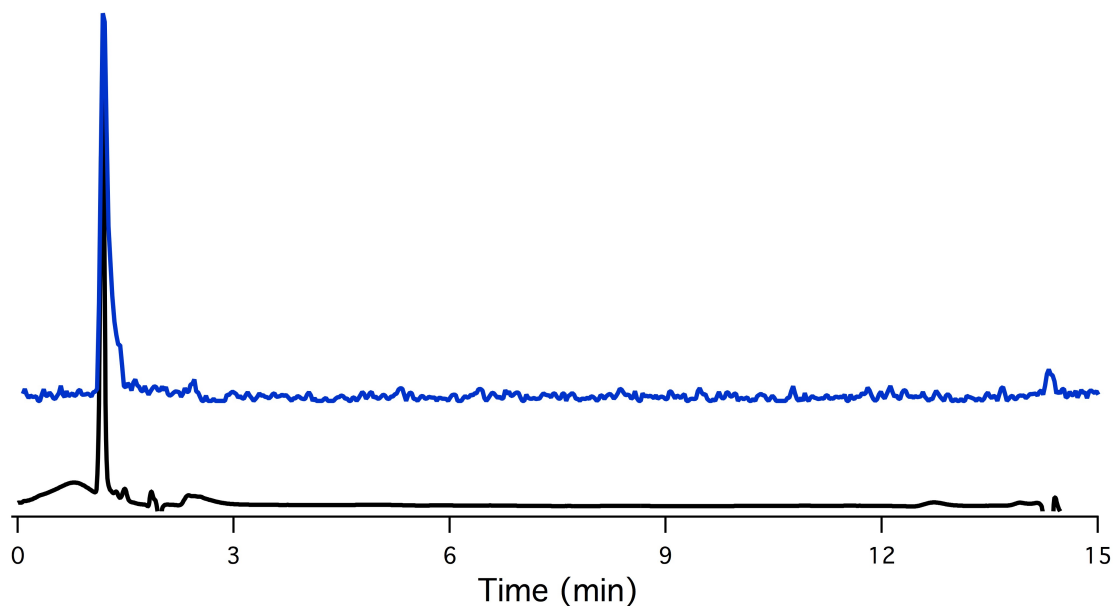

**Figure S4.** LC trace of hexameric complex at 280 nm detection (black) and MS chromatogram (blue) of extracted  $m/3z^+ = 946.2$ .

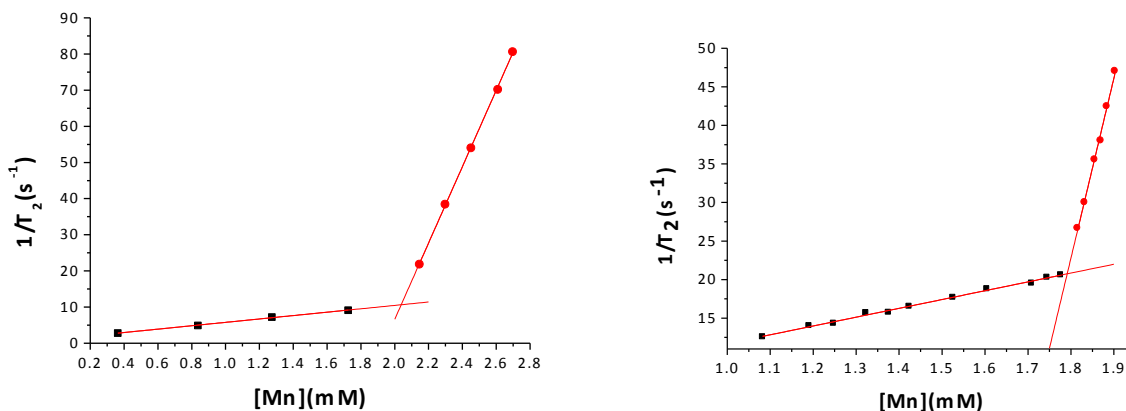

**Figure S5.**  $\text{MnCl}_2$  titrated to a solution of the monomeric (left) and dendrimeric (right) chelates. The sharp increase in  $1/T_2$  occurs when  $[\text{Mn}] > [\text{L}]$ . The molecular weight of the isolated ligand was determined by dividing mol Mn present at the point of inflection by weight of dissolved ligand material.

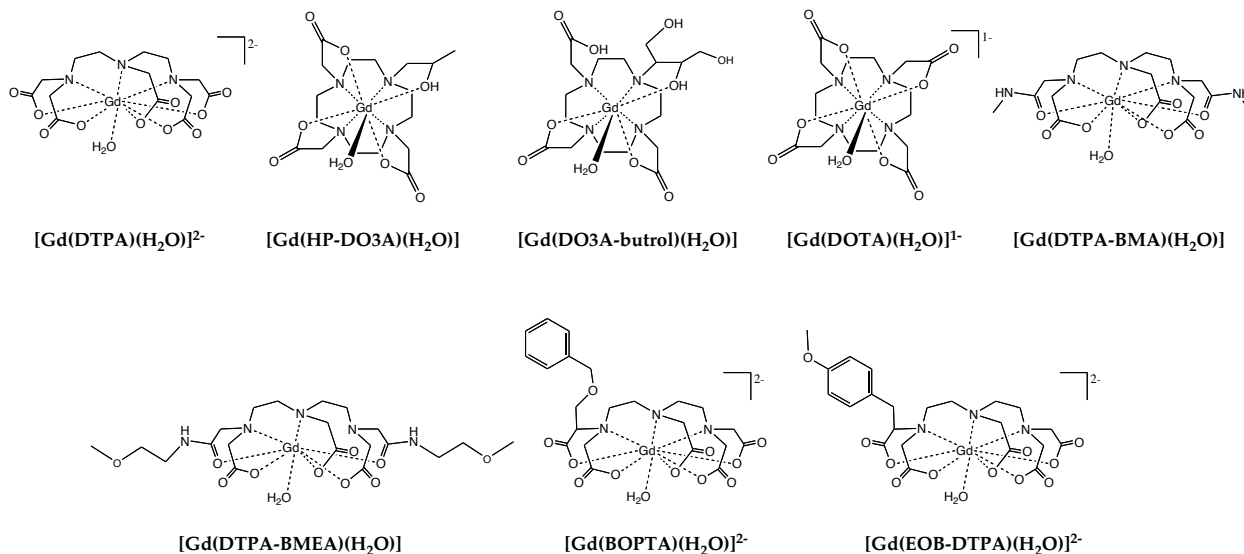

**Figure S6.** Clinically utilized Gd(III) complexes discussed for comparison in this study.

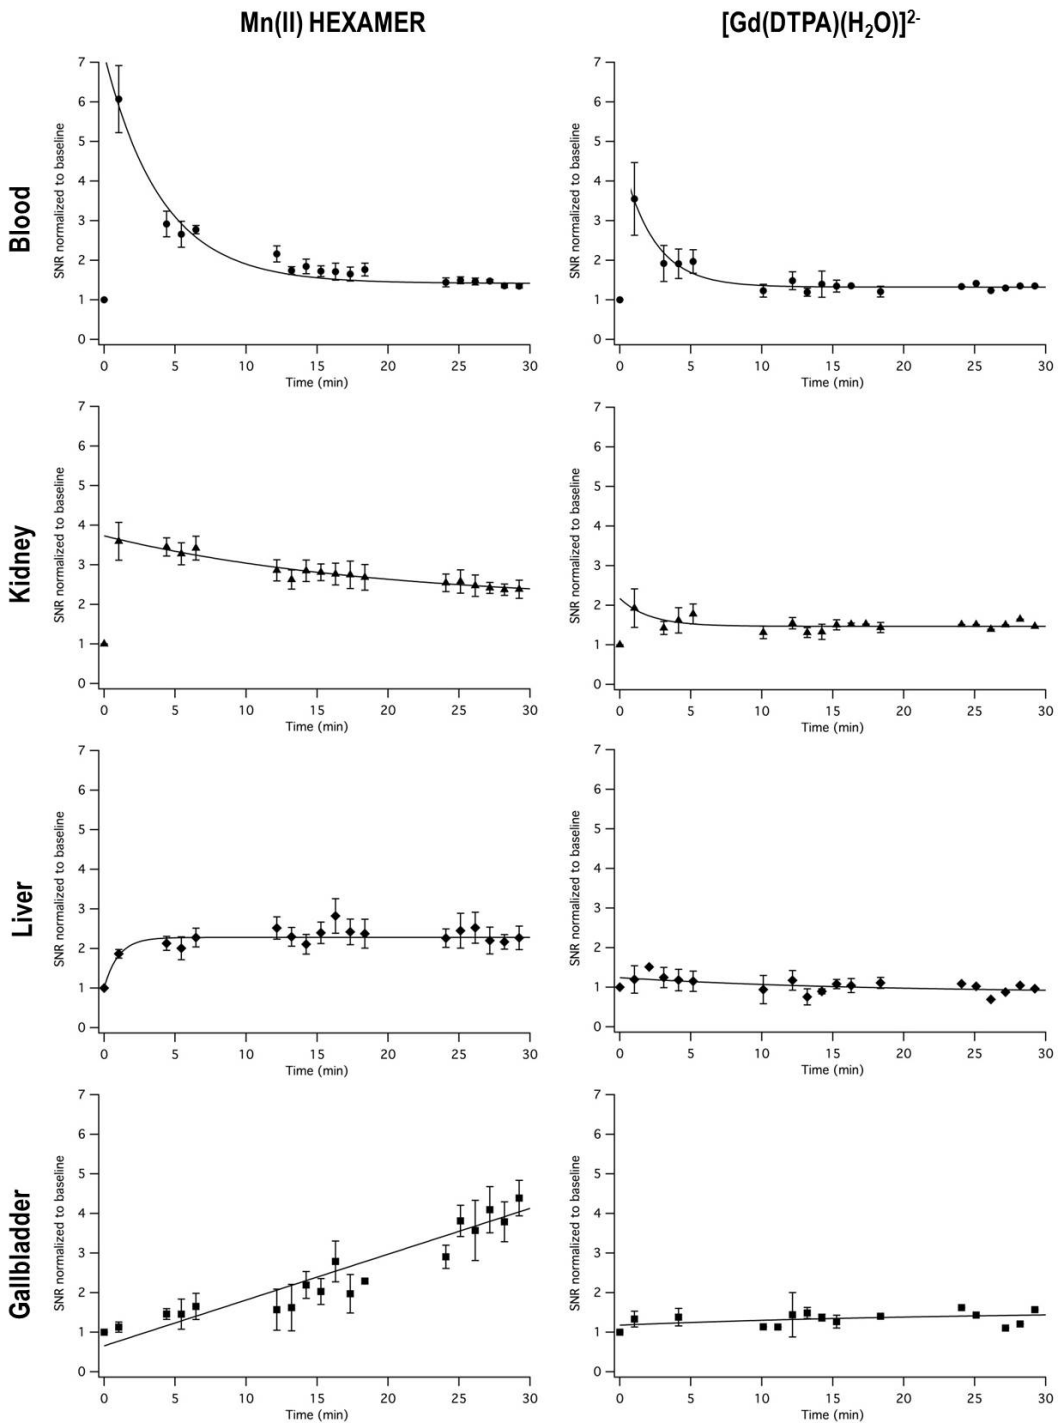

**Figure S7.** Signal-to-noise ratio (SNR) vs time curves for blood, kidney, liver, and gallbladder. After injection of both Mn(II) dendrimer and [Gd(DTPA)(H<sub>2</sub>O)]<sup>2-</sup> the blood pool signal exhibited an immediate increase, followed by rapid decrease to baseline. The increase in vascular SNR one minute post injection compared to baseline resulted in a 255±79% SNR increase for [Gd(DTPA)(H<sub>2</sub>O)]<sup>2-</sup> compared with a 507±73% SNR increase for the Mn dendrimer, a 2-fold improvement. The time course of signal

enhancement in the kidneys, liver, and gallbladder demonstrated both renal and hepatobiliary clearance for Mn(II) Hexamer, while  $[\text{Gd}(\text{DTPA})(\text{H}_2\text{O})]^{2-}$  is exclusively cleared via the kidneys.
